# Supplementary material for: Oxidative desulfurization of dibenzothiophene catalyzed by molybdenum dioxide immobilized on zirconia-modified silica
Source: Royal Society of Chemistry journal article supplement (doi:10.1039/c9nj06182g), 2020-01-01
Supplement: c9nj06182g1.pdf [file c9nj06182g1.pdf]

**Oxidative desulfurization of dibenzothiophene catalyzed by  
molybdenum dioxide immobilized on zirconia-modified silica**

Panpan Zhang,<sup>a</sup> Yibin Tong,<sup>a</sup> Mingyuan Zhu<sup>a, b, \*</sup> and Bin Dai<sup>a, b</sup>

<sup>a</sup>School of Chemistry and Chemical Engineering of Shihezi University, Shihezi,

Xinjiang 832000, PR China.

<sup>b</sup>Key Laboratory for Green Processing of Chemical Engineering of Xinjiang Bingtuan,

School of Chemistry and Chemical Engineering, Shihezi University, Shihezi 832003,

PR China.

\*Corresponding author at: School of Chemistry and Chemical Engineering of Shihezi

University, Shihezi, Xinjiang 832000, PR China.

E-mail address: [zhuminyuan@shzu.edu.cn](mailto:zhuminyuan@shzu.edu.cn).

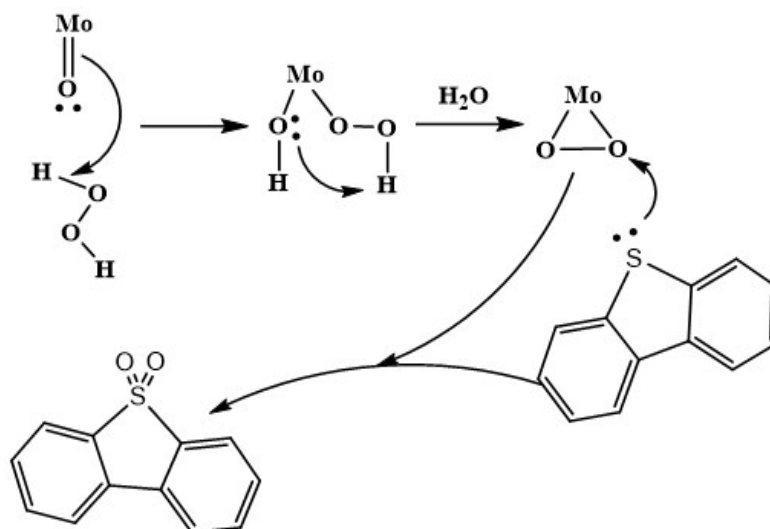

**Fig. S1** The reaction mechanism of sulfur containing compounds.

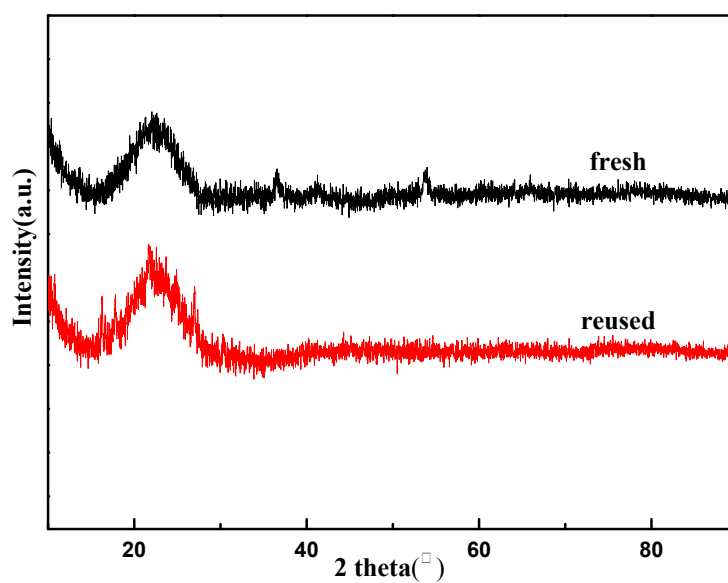

**Fig. S2** XRD patterns of fresh and reused MoO<sub>2</sub>/ZrO<sub>2</sub>-SiO<sub>2</sub> catalysts.
